# Supplementary material for: Prenatal Exposure to Chemical Mixtures and Cognitive Flexibility among Adolescents
Source: MDPI journal article supplement (doi:10.3390/toxics9120329), 2021-12-02
Supplement: s1 [file s1]

# Supplementary Materials: Prenatal Exposure to Chemical Mixtures and Cognitive Flexibility among Adolescents

Anna V. Oppenheimer, David C. Bellinger, Brent A. Coull, Marc G. Weisskopf and Susan A. Korrick

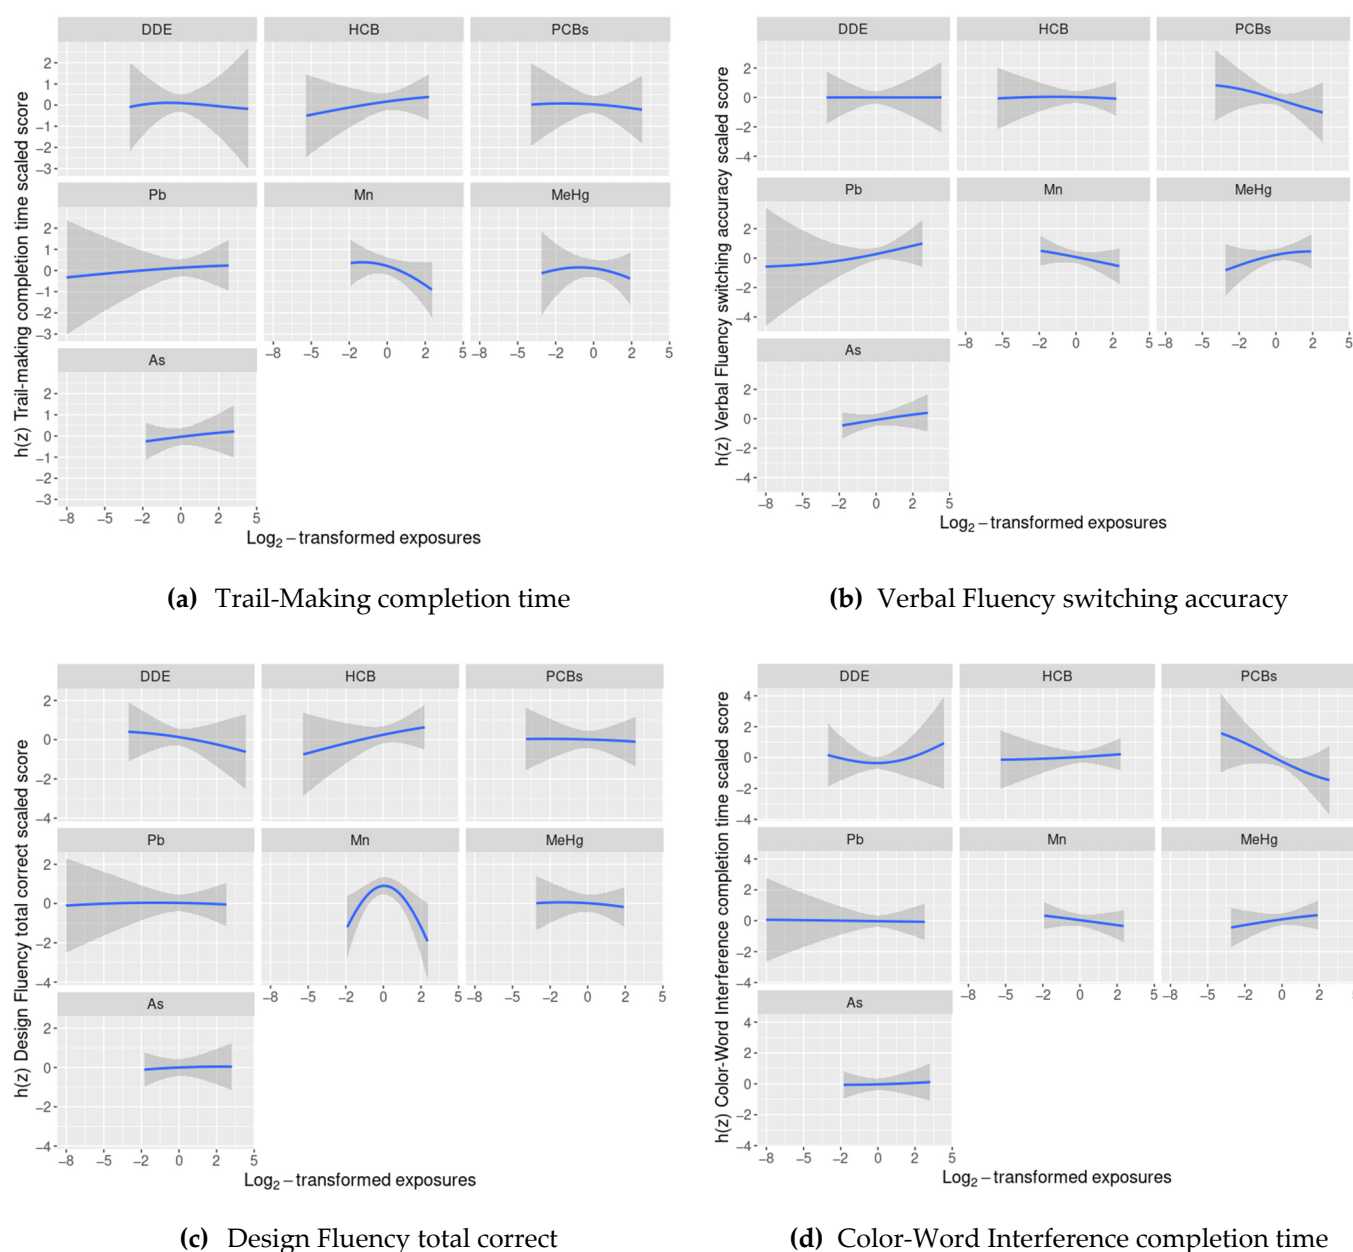

**Figure S1.** Estimated covariate-adjusted exposure-response functions and 95% credible intervals<sup>1</sup> between DDE, HCB,  $\Sigma$ PCB<sub>4</sub>, Pb, Mn, MeHg, and As and Delis Kaplan Executive Function System (D-KEFS) cognitive flexibility scaled scores: (a) Trail-Making completion time, (b) Verbal Fluency switching accuracy, (c) Design Fluency total correct, (d) Color-Word Interference completion time, among New Bedford Cohort adolescents in the secondary analysis group<sup>2</sup>. In each plot, all of the remaining exposures are assigned to their median value.

Footnotes: <sup>1</sup>Exposures have been log<sub>2</sub>-transformed and models have been adjusted for child race, sex, age at exam, year of birth, and HOME score; maternal marital status at child's birth, IQ, seafood consumption during pregnancy, and smok-

ing during pregnancy; maternal and paternal education and annual household income at child's birth; and study examiner. <sup>2</sup>Secondary analysis group: complete outcome, covariate and prenatal exposure biomarker data for DDE, HCB,  $\Sigma$ PCB<sub>4</sub>, Pb, Mn, MeHg, and As,  $n = 235$ . Abbreviations: DDE: dichlorodiphenyldichloroethylene; HCB: hexachlorobenzene;  $\Sigma$ PCB<sub>4</sub>: Sum of 4 PCB congeners (118, 138, 153, 180); Pb: lead; Mn: manganese; MeHg: methylmercury; As: arsenic.

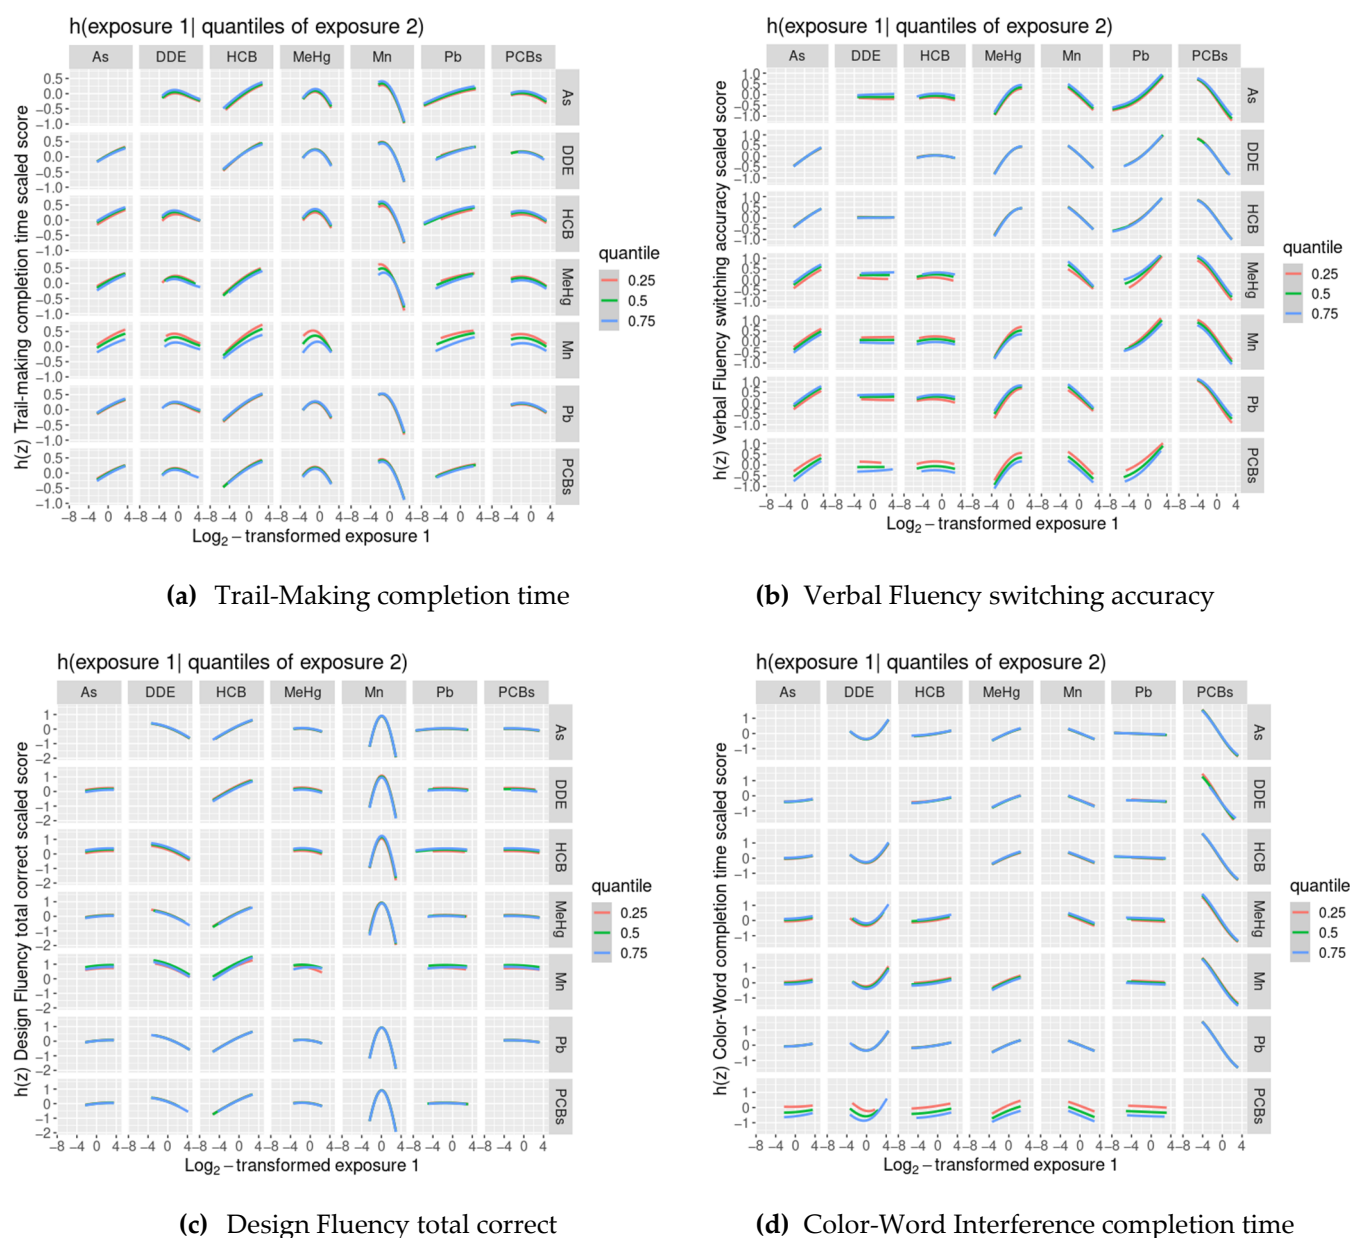

**Figure S2.** Covariate-adjusted exposure-response functions<sup>1</sup> between one of 7 exposures (DDE, HCB,  $\Sigma$ PCB<sub>4</sub>, Pb, Mn, MeHg, As) where a second exposure is fixed at various quantiles and Delis-Kaplan Executive Function System (D-KEFS) cognitive flexibility scaled scores: (a) Trail-Making completion time, (b) Verbal Fluency switching accuracy, (c) Design Fluency total correct, (d) Color-Word Interference completion time, among New Bedford cohort adolescents in the secondary analysis group<sup>2</sup>. In each plot, all of the remaining exposures are assigned their median value.

Footnotes: <sup>1</sup>Exposures have been log<sub>2</sub>-transformed and models have been adjusted for child race, sex, age at exam, year of birth, and HOME score; maternal marital status at child's birth, IQ, seafood consumption during pregnancy, and smoking during pregnancy; maternal and paternal education and annual household income at child's birth; and study examiner. <sup>2</sup>Secondary analysis group: complete outcome, covariate and prenatal exposure biomarker data for DDE, HCB,  $\Sigma$ PCB<sub>4</sub>, Pb, Mn, MeHg, and As,  $n = 235$ . Abbreviations: DDE: dichlorodiphenyldichloroethylene; HCB: hexachlorobenzene;  $\Sigma$ PCB<sub>4</sub>: Sum of 4 PCB congeners (118, 138, 153, 180); Pb: lead; Mn: manganese; MeHg: methylmercury; As: arsenic.

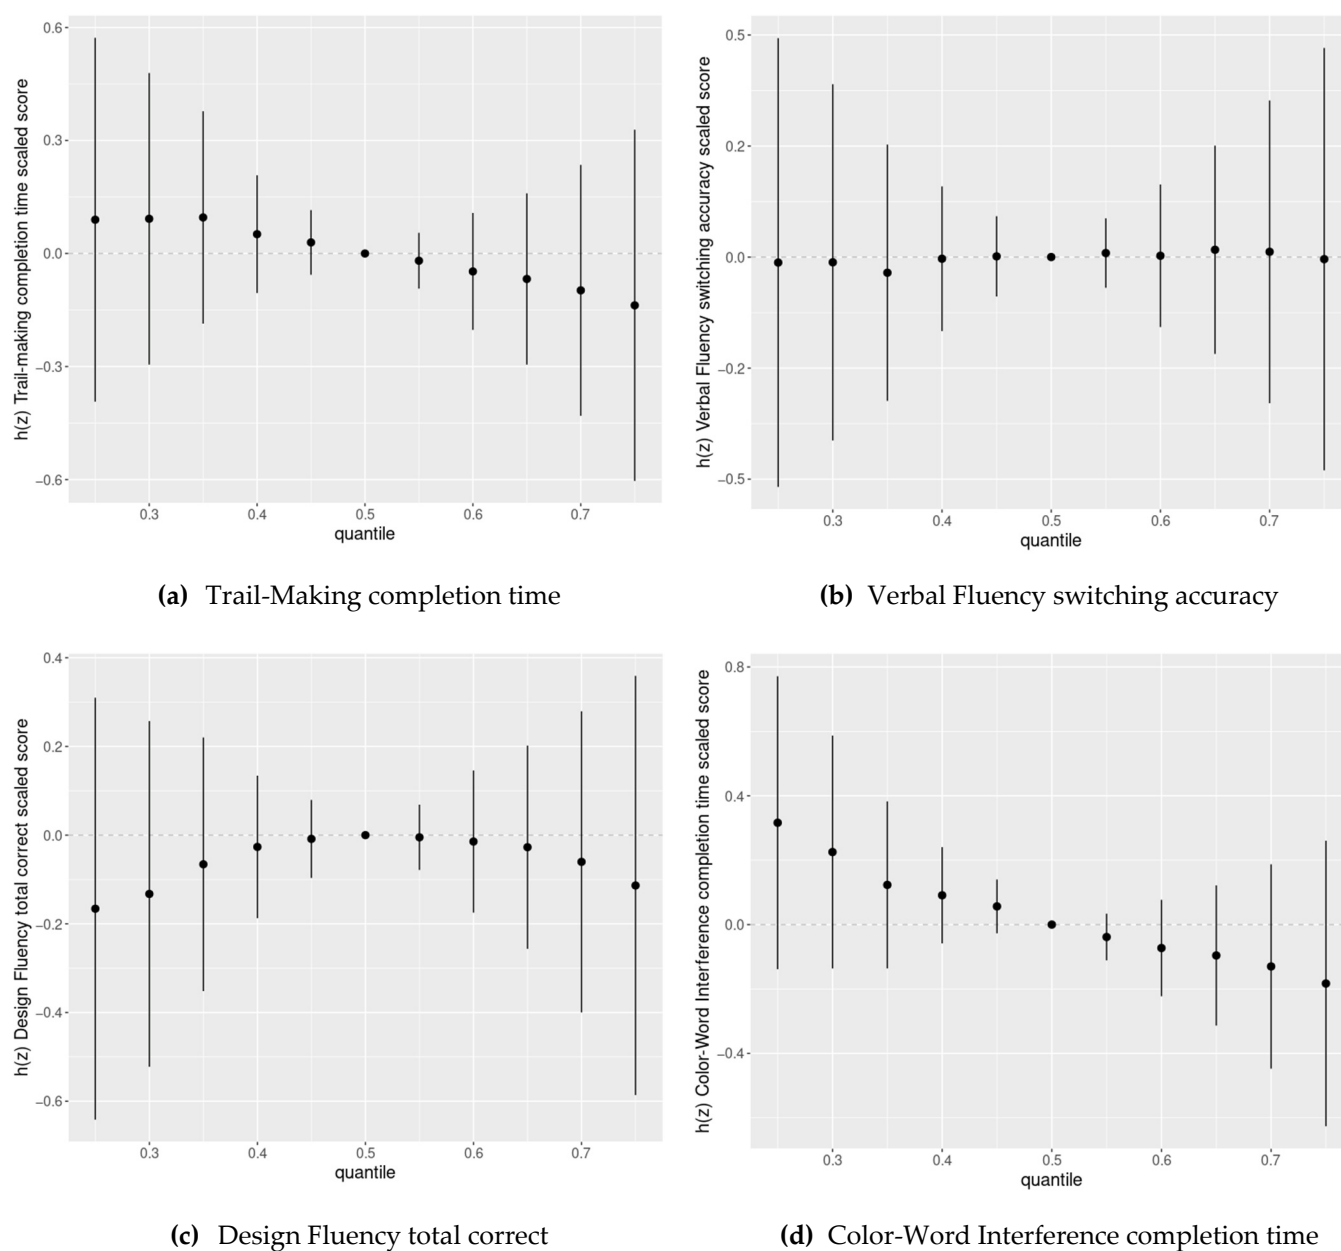

**Figure S3.** Joint association between the chemical mixture composed of DDE, HCB,  $\Sigma$ PCB<sub>4</sub>, Pb, Mn, MeHg, and As (estimates and 95% credible intervals<sup>1</sup>) and the Delis-Kaplan Executive Function System (D-KEFS) cognitive flexibility scaled scores: (a) Trail-Making completion time, (b) Verbal Fluency switching accuracy, (c) Design Fluency total correct, (d) Color-Word Interference completion time. Chemical mixture levels at various percentiles are compared to a mixture with each component at its median level, among New Bedford Cohort adolescents in the secondary analysis group<sup>2</sup>.

Footnotes: <sup>1</sup>Exposures have been log<sub>2</sub>-transformed and models have been adjusted for child race, sex, age at exam, year of birth, and HOME score; maternal marital status at child's birth, IQ, seafood consumption during pregnancy, and smoking during pregnancy; maternal and paternal education and annual household income at child's birth; and study examiner. <sup>2</sup>Secondary analysis group: complete outcome, covariate and prenatal exposure biomarker data for DDE, HCB,  $\Sigma$ PCB<sub>4</sub>, Pb, Mn, MeHg, and As,  $n = 235$ . Abbreviations: DDE: dichlorodiphenyldichloroethylene; HCB: hexachlorobenzene;  $\Sigma$ PCB<sub>4</sub>: Sum of 4 PCB congeners (118, 138, 153, 180); Pb: lead; Mn: manganese; MeHg: methylmercury; As: arsenic.

**Table S1.** Inverse-probability weighted results of multivariable linear regression analyses (difference in scaled scores associated with a twofold increase in exposure and 95% CI)<sup>1</sup> assessing the relation of prenatal exposure to a five-chemical mixture with Delis-Kaplan Executive Function System (D-KEFS) cognitive flexibility scaled scores among New Bedford Cohort adolescents in the main analysis group<sup>2</sup>.

| Exposure                           | Trail-Making completion time | Verbal Fluency switching accuracy | Design Fluency total correct | Color-Word Interference completion time |
|------------------------------------|------------------------------|-----------------------------------|------------------------------|-----------------------------------------|
|                                    | Difference (95% CI)          | Difference (95% CI)               | Difference (95% CI)          | Difference (95% CI)                     |
| Log <sub>2</sub> DDE               | −0.23 (−0.52, 0.06)          | −0.08 (−0.37, 0.21)               | 0.02 (−0.29, 0.33)           | 0.04 (−0.25, 0.32)                      |
| Log <sub>2</sub> HCB               | 0.08 (−0.24, 0.39)           | −0.10 (−0.42, 0.22)               | 0.14 (−0.19, 0.48)           | 0.03 (−0.28, 0.33)                      |
| Log <sub>2</sub> ΣPCB <sub>4</sub> | 0.07 (−0.25, 0.39)           | 0.03 (−0.29, 0.35)                | −0.08 (−0.41, 0.26)          | −0.17 (−0.48, 0.14)                     |
| Log <sub>2</sub> Pb                | 0.16 (−0.14, 0.46)           | 0.33 (0.02, 0.63) *               | 0.09 (−0.23, 0.41)           | 0.08 (−0.21, 0.38)                      |
| Log <sub>2</sub> Mn                | −0.61 (−1.17, −0.04) *       | −0.30 (−0.86, 0.27)               | −0.19 (−0.78, 0.41)          | −0.60 (−1.14, −0.05) *                  |

<sup>1</sup>Exposures have been log<sub>2</sub>-transformed and models have been adjusted for child race, sex, age at exam, year of birth, and HOME score; maternal marital status at child's birth, IQ, seafood consumption during pregnancy, and smoking during pregnancy; maternal and paternal education and annual household income at child's birth; and study examiner. <sup>2</sup>Main analysis group: complete outcome, covariate and prenatal exposure biomarker data for DDE, HCB, ΣPCB<sub>4</sub>, Pb and Mn, *n* = 373. \**p* < 0.05. Abbreviations: DDE: dichlorodiphenyldichloroethylene; HCB: hexachlorobenzene; ΣPCB<sub>4</sub>: Sum of 4 PCB congeners (118, 138, 153, 180); Pb: lead; Mn: manganese.

**Table S2.** Sex-stratified inverse probability weighted results of multivariable linear regression analyses (difference in scaled scores associated with a twofold increase in exposure and 95% CI)<sup>1</sup> assessing the relation of prenatal exposure to a five-chemical mixture with Delis-Kaplan Executive Function System (D-KEFS) cognitive flexibility scaled scores among New Bedford Cohort adolescents in the main analysis group<sup>2</sup>.

| Exposure                           | Trail-Making completion time |                        |                          | Verbal Fluency switching accuracy |                     |                          |
|------------------------------------|------------------------------|------------------------|--------------------------|-----------------------------------|---------------------|--------------------------|
|                                    | Difference (95 % CI)         |                        |                          | Difference (95% CI)               |                     |                          |
|                                    | Males                        | Females                | <i>p</i> for interaction | Males                             | Females             | <i>p</i> for interaction |
| Log <sub>2</sub> DDE               | −0.29 (−0.71, 0.14)          | −0.16 (−0.61, 0.28)    | 0.6                      | −0.24 (−0.65, 0.16)               | 0.08 (−0.40, 0.55)  | 0.2                      |
| Log <sub>2</sub> HCB               | 0.05 (−0.41, 0.52)           | 0.12 (−0.34, 0.57)     | 0.6                      | −0.28 (−0.72, 0.17)               | −0.10 (−0.59, 0.39) | 0.8                      |
| Log <sub>2</sub> ΣPCB <sub>4</sub> | 0.19 (−0.28, 0.66)           | −0.09 (−0.57, 0.38)    | 0.7                      | 0.10 (−0.35, 0.55)                | −0.09 (−0.60, 0.42) | 0.3                      |
| Log <sub>2</sub> Pb                | 0.47 (−0.07, 1.02)           | 0.01 (−0.35, 0.37)     | 0.1                      | 0.72 (0.20, 1.23) *               | 0.11 (−0.27, 0.50)  | 0.2                      |
| Log <sub>2</sub> Mn                | −0.13 (−0.95, 0.69)          | −0.85 (−1.65, −0.06) * | 0.3                      | −0.56 (−1.35, 0.22)               | 0.03 (−0.82, 0.89)  | 0.4                      |

  

| Exposure                           | Design Fluency total correct |                     |                          | Color-Word Interference completion time |                     |                          |
|------------------------------------|------------------------------|---------------------|--------------------------|-----------------------------------------|---------------------|--------------------------|
|                                    | Difference (95% CI)          |                     |                          | Difference (95% CI)                     |                     |                          |
|                                    | Males                        | Females             | <i>p</i> for interaction | Males                                   | Females             | <i>p</i> for interaction |
| Log <sub>2</sub> DDE               | 0.21 (−0.26, 0.68)           | −0.05 (−0.50, 0.39) | 0.4                      | 0.04 (−0.39, 0.46)                      | 0.09 (−0.32, 0.51)  | 0.8                      |
| Log <sub>2</sub> HCB               | −0.29 (−0.80, 0.22)          | 0.76 (0.29, 1.22) * | < 0.01*                  | −0.05 (−0.51, 0.41)                     | 0.07 (−0.36, 0.50)  | 0.5                      |
| Log <sub>2</sub> ΣPCB <sub>4</sub> | 0.00 (−0.52, 0.51)           | −0.34 (−0.82, 0.14) | 0.5                      | −0.36 (−0.83, 0.10)                     | −0.01 (−0.45, 0.44) | 0.2                      |
| Log <sub>2</sub> Pb                | 0.31 (−0.28, 0.91)           | −0.05 (−0.42, 0.31) | 0.3                      | 0.08 (−0.46, 0.62)                      | 0.01 (−0.33, 0.35)  | 0.9                      |
| Log <sub>2</sub> Mn                | −0.57 (−1.47, 0.33)          | 0.45 (−0.36, 1.25)  | 0.1                      | −0.55 (−1.36, 0.27)                     | −0.46 (−1.20, 0.29) | 1.0                      |

<sup>1</sup>Exposures have been log<sub>2</sub>-transformed and models have been adjusted for child race, sex, age at exam, year of birth, and HOME score; maternal marital status at child's birth, IQ, seafood consumption during pregnancy, and smoking during pregnancy; maternal and paternal education and annual household income at child's birth; and study examiner. <sup>2</sup>Main analysis group: complete outcome, covariate and prenatal exposure biomarker data for DDE, HCB, ΣPCB<sub>4</sub>, Pb and Mn. Total *n* = 373; Males *n* = 179; Females *n* = 194. \**p* < 0.05. Abbreviations: DDE: dichlorodiphenyldichloroethylene; HCB: hexachlorobenzene; ΣPCB<sub>4</sub>: Sum of 4 PCB congeners (118, 138, 153, 180); Pb: lead; Mn: manganese.

**Table S3.** Prenatal social disadvantage index (PNSDI)<sup>1</sup>-stratified inverse probability weighted results of multivariable linear regression analyses (difference in scaled scores associated with a twofold increase in exposure and 95% CI)<sup>2</sup> assessing the relation of prenatal exposure to a five-chemical mixture with Delis-Kaplan Executive Function System (D-KEFS) cognitive flexibility scaled scores among New Bedford Cohort adolescents in the main analysis group<sup>3</sup>.

| Exposure                           | Trail-Making completion time |                     |                          | Verbal Fluency switching accuracy |                     |                          |
|------------------------------------|------------------------------|---------------------|--------------------------|-----------------------------------|---------------------|--------------------------|
|                                    | Difference (95% CI)          |                     | <i>p</i> for interaction | Difference (95% CI)               |                     | <i>p</i> for interaction |
|                                    | PNSDI < 3                    | PNSDI ≥ 3           |                          | PNSDI < 3                         | PNSDI ≥ 3           |                          |
| Log <sub>2</sub> DDE               | −0.10 (−0.42, 0.23)          | −0.42 (−1.03, 0.19) | 0.2                      | −0.09 (−0.44, 0.25)               | −0.15 (−0.72, 0.42) | 0.8                      |
| Log <sub>2</sub> HCB               | 0.23 (−0.15, 0.61)           | −0.19 (−0.78, 0.39) | 0.1                      | 0.06 (−0.35, 0.47)                | −0.40 (−0.94, 0.15) | 0.2                      |
| Log <sub>2</sub> ΣPCB <sub>4</sub> | −0.10 (−0.46, 0.26)          | 0.46 (−0.20, 1.12)  | 0.2                      | 0.09 (−0.30, 0.48)                | 0.10 (−0.51, 0.71)  | 0.8                      |
| Log <sub>2</sub> Pb                | 0.03 (−0.34, 0.40)           | 0.07 (−0.52, 0.66)  | 0.9                      | 0.22 (−0.18, 0.62)                | 0.35 (−0.20, 0.89)  | 0.5                      |
| Log <sub>2</sub> Mn                | −0.72 (−1.40, −0.05) *       | −0.29 (−1.35, 0.77) | 0.6                      | −0.31 (−1.04, 0.41)               | −0.21 (−1.19, 0.78) | 0.8                      |

  

| Exposure                           | Design Fluency total correct |                     |                          | Color-Word Interference completion time |                     |                          |
|------------------------------------|------------------------------|---------------------|--------------------------|-----------------------------------------|---------------------|--------------------------|
|                                    | Difference (95% CI)          |                     | <i>p</i> for interaction | Difference (95% CI)                     |                     | <i>p</i> for interaction |
|                                    | PNSDI < 3                    | PNSDI ≥ 3           |                          | PNSDI < 3                               | PNSDI ≥ 3           |                          |
| Log <sub>2</sub> DDE               | 0.09 (−0.30, 0.47)           | −0.19 (−0.73, 0.35) | 0.3                      | 0.22 (−0.09, 0.53)                      | −0.16 (−0.75, 0.42) | 0.2                      |
| Log <sub>2</sub> HCB               | 0.60 (0.16, 1.05) *          | −0.47 (−0.99, 0.06) | < 0.01*                  | 0.12 (−0.24, 0.49)                      | −0.09 (−0.65, 0.47) | 0.3                      |
| Log <sub>2</sub> ΣPCB <sub>4</sub> | −0.30 (−0.72, 0.13)          | 0.39 (−0.19, 0.98)  | 0.1                      | −0.35 (−0.69, 0.00)                     | 0.23 (−0.40, 0.86)  | 0.2                      |
| Log <sub>2</sub> Pb                | −0.05 (−0.49, 0.38)          | 0.18 (−0.35, 0.70)  | 0.5                      | −0.17 (−0.52, 0.19)                     | 0.23 (−0.34, 0.79)  | 0.3                      |
| Log <sub>2</sub> Mn                | −0.22 (−1.02, 0.57)          | −0.32 (−1.26, 0.62) | 0.8                      | −0.60 (−1.25, 0.05)                     | −0.46 (−1.48, 0.55) | 0.8                      |

<sup>1</sup>Prenatal social disadvantage index (PNSDI) was constructed as the sum of five adverse social or economic exposures at the time of the child's birth where presence of each risk factor was assigned a value of 1, absence a value of 0: mother unmarried, mother's education as a high school graduate or less, father's education as a high school graduate or less, annual household income less than \$20,000, and mother's age at birth less than 20 years. <sup>2</sup>Exposures have been log<sub>2</sub>-transformed and models have been adjusted for child race, sex, age at exam, year of birth, and HOME score; maternal marital status at child's birth, IQ, seafood consumption during pregnancy, and smoking during pregnancy; maternal and paternal education and annual household income at child's birth; and study examiner. <sup>3</sup>Main analysis group: complete outcome, covariate and prenatal exposure biomarker data for DDE, HCB, ΣPCB<sub>4</sub>, Pb and Mn. Total *n* = 373; PNSDI < 3 *n* = 241; PNSDI ≥ 3 *n* = 132. \**p* < 0.05. Abbreviations: DDE: dichlorodiphenyldichloroethylene; HCB: hexachlorobenzene; ΣPCB<sub>4</sub>: Sum of 4 PCB congeners (118, 138, 153, 180); Pb: lead; Mn: manganese.

**Table S4.** Complete-case results of negative binomial regression analyses [rate ratio (RR) and 95% CI]<sup>1</sup> assessing the relation of prenatal exposure to a five- chemical mixture with Delis-Kaplan Executive Function System (D-KEFS) cognitive flexibility error raw scores among adolescents in the main analysis group<sup>2</sup>.

| Exposure                           | Trail-Making total errors | Verbal Fluency total errors | Design Fluency total errors | Color-Word Interference total errors |
|------------------------------------|---------------------------|-----------------------------|-----------------------------|--------------------------------------|
|                                    | RR (95% CI)               | RR (95% CI)                 | errors                      | errors                               |
|                                    | RR (95% CI)               | RR (95% CI)                 | RR (95% CI)                 | RR (95% CI)                          |
| Log <sub>2</sub> DDE               | 1.00 (0.88, 1.14)         | 1.23 (1.05, 1.43) *         | 0.99 (0.88, 1.12)           | 0.98 (0.89, 1.07)                    |
| Log <sub>2</sub> HCB               | 0.99 (0.86, 1.14)         | 0.91 (0.77, 1.06)           | 1.05 (0.92, 1.18)           | 1.03 (0.93, 1.14)                    |
| Log <sub>2</sub> ΣPCB <sub>4</sub> | 1.01 (0.88, 1.17)         | 0.95 (0.80, 1.14)           | 1.00 (0.88, 1.14)           | 1.08 (0.97, 1.19)                    |
| Log <sub>2</sub> Pb                | 0.98 (0.86, 1.11)         | 1.13 (0.96, 1.34)           | 0.99 (0.88, 1.11)           | 1.09 (0.99, 1.20)                    |
| Log <sub>2</sub> Mn                | 1.30 (1.01, 1.67) *       | 0.79 (0.58, 1.06)           | 0.83 (0.66, 1.03)           | 0.98 (0.82, 1.17)                    |

<sup>1</sup>Exposures have been log<sub>2</sub>-transformed and models have been adjusted for child race, sex, age at exam, year of birth, and HOME score; maternal marital status at child's birth, IQ, seafood consumption during pregnancy, and smoking during pregnancy; maternal and paternal education and annual household income at child's birth; and study examiner. <sup>2</sup>Main analysis group: complete outcome, covariate and prenatal exposure biomarker data for DDE, HCB, ΣPCB<sub>4</sub>, Pb and Mn, *n* = 373. \**p* < 0.05. Abbreviations: DDE: dichlorodiphenyldichloroethylene; HCB: hexachlorobenzene; ΣPCB<sub>4</sub>: Sum of 4 PCB congeners (118, 138, 153, 180); Pb: lead; Mn: manganese.

**Table S5.** Complete-case results of logistic regression analyses [odds ratio (OR) and 95% CI]<sup>1</sup> assessing the relation of prenatal exposure to a five-chemical mixture with odds of poor performance on Delis-Kaplan Executive Function System (D-KEFS) overall Trail-Making and Color-Word Interference performance<sup>2</sup> among adolescents in the main analysis group<sup>3</sup>.

| Exposure                           | Trail-Making Overall Performance<br>OR (95% CI) | Color-Word Interference Overall Performance<br>OR (95% CI) |
|------------------------------------|-------------------------------------------------|------------------------------------------------------------|
| Log <sub>2</sub> DDE               | 1.13 (0.86, 1.48)                               | 0.96 (0.69, 1.32)                                          |
| Log <sub>2</sub> HCB               | 0.97 (0.73, 1.28)                               | 1.00 (0.73, 1.39)                                          |
| Log <sub>2</sub> ΣPCB <sub>4</sub> | 0.93 (0.70, 1.25)                               | 1.54 (1.09, 2.17) *                                        |
| Log <sub>2</sub> Pb                | 1.11 (0.85, 1.46)                               | 1.34 (0.98, 1.82)                                          |
| Log <sub>2</sub> Mn                | 1.52 (0.91, 2.54)                               | 1.77 (0.99, 3.17)                                          |

<sup>1</sup>Exposures have been log<sub>2</sub>-transformed and models have been adjusted for child race, sex, age at exam, year of birth, and HOME score; maternal marital status at child's birth, IQ, seafood consumption during pregnancy, and smoking during pregnancy; maternal and paternal education and annual household income at child's birth; and study examiner. <sup>2</sup>Performance takes into account both completion time and total errors raw scores. Those in the best performance group include anyone with < median level completion time and < median total errors with the remaining observations in the poor performance group. <sup>3</sup>Main analysis group: complete outcome, covariate and prenatal exposure biomarker data for DDE, HCB, ΣPCB<sub>4</sub>, Pb and Mn, *n* = 373. \**p* < 0.05. Abbreviations: DDE: dichlorodiphenyldichloroethylene; HCB: hexachlorobenzene; ΣPCB<sub>4</sub>: Sum of 4 PCB congeners (118, 138, 153, 180); Pb: lead; Mn: manganese.

**Table S6.** Inverse probability weighted results of negative binomial regression analyses [RR (rate ratio) and 95% CI]<sup>1</sup> assessing the relation of prenatal exposure to a five-chemical mixture with Delis-Kaplan Executive Function System (D-KEFS) cognitive flexibility error raw scores among New Bedford Cohort adolescents in the main analysis group<sup>2</sup>.

| Exposure                           | Trail-Making<br>total errors<br>RR (95% CI) | Verbal Fluency<br>total errors<br>RR (95% CI) | Design Fluency<br>total errors<br>RR (95% CI) | Color-Word Interference<br>total errors<br>RR (95% CI) |
|------------------------------------|---------------------------------------------|-----------------------------------------------|-----------------------------------------------|--------------------------------------------------------|
| Log <sub>2</sub> DDE               | 1.00 (0.88, 1.13)                           | 1.24 (1.06, 1.45) *                           | 1.00 (0.89, 1.12)                             | 0.98 (0.89, 1.07)                                      |
| Log <sub>2</sub> HCB               | 1.00 (0.86, 1.15)                           | 0.90 (0.77, 1.05)                             | 1.05 (0.93, 1.19)                             | 1.03 (0.94, 1.14)                                      |
| Log <sub>2</sub> ΣPCB <sub>4</sub> | 1.01 (0.88, 1.16)                           | 0.94 (0.79, 1.12)                             | 0.99 (0.87, 1.12)                             | 1.06 (0.96, 1.17)                                      |
| Log <sub>2</sub> Pb                | 1.00 (0.88, 1.14)                           | 1.13 (0.96, 1.34)                             | 1.00 (0.89, 1.13)                             | 1.10 (1.00, 1.21)                                      |
| Log <sub>2</sub> Mn                | 1.26 (0.99, 1.62)                           | 0.80 (0.59, 1.07)                             | 0.83 (0.67, 1.04)                             | 0.96 (0.81, 1.14)                                      |

<sup>1</sup>Exposures have been log<sub>2</sub>-transformed and models have been adjusted for child race, sex, age at exam, year of birth, and HOME score; maternal marital status at child's birth, IQ, seafood consumption during pregnancy, and smoking during pregnancy; maternal and paternal education and annual household income at child's birth; and study examiner. <sup>2</sup>Main analysis group: complete outcome, covariate and prenatal exposure biomarker data for DDE, HCB, ΣPCB<sub>4</sub>, Pb and Mn, *n* = 373. \**p* < 0.05. Abbreviations: DDE: dichlorodiphenyldichloroethylene; HCB: hexachlorobenzene; ΣPCB<sub>4</sub>: Sum of 4 PCB congeners (118, 138, 153, 180); Pb: lead; Mn: manganese.

**Table S7.** Inverse probability weighted results of logistic regression analyses [odds ratio (OR) and 95% CI]<sup>1</sup> assessing the relation of prenatal exposure to a five-chemical mixture with odds of poor performance on Delis-Kaplan Executive Function System (D-KEFS) overall Trail-Making and Color-Word Interference performance<sup>2</sup> among New Bedford Cohort adolescents in the main analysis group<sup>3</sup>.

| Exposure                           | Trail-Making Overall Performance<br>OR (95% CI) | Color-Word Interference Overall<br>Performance<br>OR (95% CI) |
|------------------------------------|-------------------------------------------------|---------------------------------------------------------------|
| Log <sub>2</sub> DDE               | 1.12 (0.86, 1.47)                               | 0.92 (0.67, 1.27)                                             |
| Log <sub>2</sub> HCB               | 0.97 (0.74, 1.29)                               | 1.06 (0.77, 1.45)                                             |
| Log <sub>2</sub> ΣPCB <sub>4</sub> | 0.93 (0.70, 1.24)                               | 1.49 (1.06, 2.10) *                                           |
| Log <sub>2</sub> Pb                | 1.12 (0.85, 1.47)                               | 1.36 (1.00, 1.85)                                             |
| Log <sub>2</sub> Mn                | 1.53 (0.92, 2.57)                               | 1.66 (0.92, 2.98)                                             |

<sup>1</sup>Exposures have been log<sub>2</sub>-transformed and models have been adjusted for child race, sex, age at exam, year of birth, and HOME score; maternal marital status at child's birth, IQ, seafood consumption during pregnancy, and smoking during pregnancy; maternal and paternal education and annual household income at child's birth; and study examiner. <sup>2</sup>Performance takes into account both completion time and total errors raw scores. Those in the best performance group include anyone with < median level completion time and < median level total errors with the remaining observations in the poor performance group. <sup>3</sup>Main analysis group: complete outcome, covariate and prenatal exposure biomarker data for DDE,

HCB,  $\Sigma$ PCB<sub>4</sub>, Pb and Mn,  $n = 373$ . \* $p < 0.05$ . Abbreviations: DDE: dichlorodiphenyldichloroethylene; HCB: hexachlorobenzene;  $\Sigma$ PCB<sub>4</sub>: Sum of 4 PCB congeners (118, 138, 153, 180); Pb: lead; Mn: manganese.

**Table S8.** Characteristics of New Bedford Cohort participants who were evaluated as adolescents and included in the secondary analysis group<sup>1</sup>, and those who were excluded from the secondary analysis group.

| Descriptive Characteristic                  | Secondary analysis group, $n = 235$ |               |           | Excluded group, $n = 553$ |               |           | $p$ -value <sup>3</sup> |
|---------------------------------------------|-------------------------------------|---------------|-----------|---------------------------|---------------|-----------|-------------------------|
| Cognitive Flexibility Measures <sup>2</sup> | $n(\%)$                             | Mean $\pm$ SD | Range     | $n(\%)$                   | Mean $\pm$ SD | Range     |                         |
| Trail-Making                                |                                     |               |           |                           |               |           |                         |
| Completion time scaled score                | 235                                 | 9.8 (2.7)     | 1–14      | 293                       | 9.1 (2.8)     | 1–14      | < 0.01*                 |
| Total errors                                | 235                                 | 0.8 (1.1)     | 0–5       | 292                       | 1 (1.3)       | 0–13      | 0.03*                   |
| Overall Trail-Making performance            |                                     |               |           |                           |               |           |                         |
| Best performance                            | 83 (35.3)                           |               |           | 75 (13.6)                 |               |           | 0.02*                   |
| Poor performance                            | 152 (64.7)                          |               |           | 217 (39.2)                |               |           |                         |
| Missing                                     | 0                                   |               |           | 261 (47.2)                |               |           |                         |
| Verbal Fluency scores                       |                                     |               |           |                           |               |           |                         |
| Total switching accuracy scaled score       | 235                                 | 9.2 (2.8)     | 3–17      | 293                       | 9.1 (2.8)     | 1–17      | 0.6                     |
| Total errors                                | 235                                 | 0.8 (1.2)     | 0–7       | 293                       | 0.9 (1.2)     | 0–7       | 0.4                     |
| Design Fluency                              |                                     |               |           |                           |               |           |                         |
| Total correct scaled score                  | 235                                 | 10.0 (2.8)    | 2–18      | 293                       | 9.7 (2.7)     | 2–17      | 0.2                     |
| Total errors                                | 235                                 | 2.5 (3.0)     | 0–22      | 293                       | 2.7 (3.0)     | 0–20      | 0.2                     |
| Color-Word Interference                     |                                     |               |           |                           |               |           |                         |
| Completion time scaled score                | 235                                 | 10 (2.6)      | 1–15      | 292                       | 9.8 (2.6)     | 1–15      | 0.2                     |
| Total errors                                | 235                                 | 2.6 (2.5)     | 0–19      | 292                       | 2.8 (2.4)     | 0–11      | 0.2                     |
| Overall Color-Word Interference performance |                                     |               |           |                           |               |           | 0.3                     |
| Best performance                            | 58 (24.7)                           |               |           | 59 (10.7)                 |               |           |                         |
| Poor performance                            | 177 (75.3)                          |               |           | 233 (42.1)                |               |           |                         |
| Missing                                     | 0                                   |               |           | 261 (47.2)                |               |           |                         |
| Exposure Measures <sup>4</sup>              |                                     |               |           |                           |               |           |                         |
| Cord serum DDE (ng/g)                       | 235                                 | 0.6 (1.4)     | 0.02–14.9 | 516                       | 0.4 (0.7)     | 0.0–10.2  | 0.04*                   |
| Cord serum HCB (ng/g)                       | 235                                 | 0.03 (0.02)   | 0.0–0.1   | 516                       | 0.03 (0.04)   | 0.0–0.7   | 0.2                     |
| Cord serum $\Sigma$ PCB <sub>4</sub> (ng/g) | 235                                 | 0.3 (0.3)     | 0.01–2.3  | 516                       | 0.2 (0.3)     | 0.01–4.4  | 0.2                     |
| Cord blood Pb ( $\mu$ g/dL)                 | 235                                 | 1.4 (0.9)     | 0.0–9.4   | 513                       | 1.6 (1.5)     | 0.01–17.4 | 0.01*                   |
| Cord blood Mn ( $\mu$ g/dL)                 | 235                                 | 4.3 (1.6)     | 1.7–11.2  | 473                       | 4.2 (1.9)     | 0.2–22.1  | 0.8                     |
| Maternal hair MeHg ( $\mu$ g/g)             | 235                                 | 0.6 (0.6)     | 0.03–3.1  | 276                       | 0.6 (0.7)     | 0.03–9.2  | 0.3                     |
| Maternal toenail As ( $\mu$ g/g)            | 235                                 | 0.1 (0.1)     | 0.02–0.8  | 181                       | 0.1 (0.1)     | 0.02–1.0  | 0.5                     |
| Covariate Measures <sup>5</sup>             |                                     |               |           |                           |               |           |                         |
| Child Characteristics                       |                                     |               |           |                           |               |           |                         |
| Race/Ethnicity                              |                                     |               |           |                           |               |           | < 0.01*                 |
| Non-Hispanic White                          | 186 (79.1)                          |               |           | 345 (62.4)                |               |           |                         |
| Hispanic                                    | 16 (6.8)                            |               |           | 73 (13.2)                 |               |           |                         |
| Other                                       | 33 (14.0)                           |               |           | 133 (24.1)                |               |           |                         |
| Missing                                     | 0                                   |               |           | 2 (0.4)                   |               |           |                         |
| Sex                                         |                                     |               |           |                           |               |           | 0.3                     |
| Male                                        | 114 (48.5)                          |               |           | 294 (53.2)                |               |           |                         |
| Female                                      | 121 (51.5)                          |               |           | 259 (46.8)                |               |           |                         |
| Age at Exam                                 | 235                                 | 15.5 (0.6)    | 14.4–17.7 | 293                       | 15.6 (0.6)    | 13.9–17.9 | 0.5                     |
| Home Score                                  | 235                                 | 44.4 (6.0)    | 27–56     | 256                       | 42.8 (6.5)    | 21–56     | < 0.01*                 |
| Year of Birth                               |                                     |               |           |                           |               |           | 0.03*                   |
| 1993–1994                                   | 76 (32.3)                           |               |           | 183 (33.1)                |               |           |                         |
| 1995–1996                                   | 104 (44.3)                          |               |           | 196 (35.4)                |               |           |                         |
| 1997–1998                                   | 55 (23.4)                           |               |           | 174 (31.5)                |               |           |                         |
| Maternal Characteristics                    |                                     |               |           |                           |               |           |                         |
| Marital status at birth                     |                                     |               |           |                           |               |           | < 0.01*                 |
| Not married                                 | 74 (31.5)                           |               |           | 257 (46.5)                |               |           |                         |

|                                     |            |             |        |            |             |        |         |
|-------------------------------------|------------|-------------|--------|------------|-------------|--------|---------|
| Married                             | 161 (68.5) |             |        | 241 (43.6) |             |        |         |
| Missing                             | 0          |             |        | 55 (9.9)   |             |        |         |
| Maternal IQ                         | 235        | 100.6 (9.7) | 67–124 | 400        | 96.3 (10.5) | 57–126 | < 0.01* |
| Seafood during pregnancy (serv/day) | 235        | 0.5 (0.6)   | 0–5.3  | 398        | 0.6 (0.7)   | 0–6    | 0.5     |
| Smoking during pregnancy            |            |             |        |            |             |        | 0.3     |
| No                                  | 171 (72.8) |             |        | 311 (56.2) |             |        |         |
| Yes                                 | 64 (27.2)  |             |        | 140 (25.3) |             |        |         |
| Missing                             | 0          |             |        | 102 (18.4) |             |        |         |
| Maternal education                  |            |             |        |            |             |        | < 0.01* |
| ≤ High School                       | 108 (46.0) |             |        | 313 (56.6) |             |        |         |
| > High School                       | 127 (54.0) |             |        | 183 (33.1) |             |        |         |
| Missing                             | 0          |             |        | 57 (10.3)  |             |        |         |
| Household Characteristics at Birth  |            |             |        |            |             |        |         |
| Paternal Education                  |            |             |        |            |             |        | 0.01*   |
| ≤ High School                       | 152 (64.7) |             |        | 360 (65.1) |             |        |         |
| > High School                       | 83 (35.3)  |             |        | 125 (22.6) |             |        |         |
| Missing                             | 0          |             |        | 68 (12.3)  |             |        |         |
| Annual Household Income             |            |             |        |            |             |        | < 0.01* |
| < \$20,000                          | 62 (26.4)  |             |        | 203 (36.7) |             |        |         |
| ≥ \$20,000                          | 173 (73.6) |             |        | 286 (51.7) |             |        |         |
| Missing                             | 0          |             |        | 64 (11.6)  |             |        |         |
| Examination Characteristics         |            |             |        |            |             |        |         |
| Examiner                            |            |             |        |            |             |        | 0.3     |
| 1                                   | 171 (72.8) |             |        | 227 (41.0) |             |        |         |
| 2                                   | 64 (27.2)  |             |        | 66 (11.9)  |             |        |         |
| Missing                             | 0          |             |        | 260 (47.0) |             |        |         |

<sup>1</sup>Secondary analysis group: complete outcome, covariate and prenatal exposure biomarker data for DDE, HCB, ΣPCB<sub>4</sub>, Pb, Mn, MeHg, and As, *n* = 235. <sup>2</sup>NBC participants with missing cognitive flexibility measures: Trail-making completion time *n* = 260; Trail-making total errors *n* = 261; Verbal Fluency switching accuracy *n* = 260; Verbal Fluency total errors *n* = 260; Design Fluency total correct *n* = 260; Design Fluency total errors *n* = 260; Color-Word Interference completion time *n* = 261; Color-Word Interference total errors *n* = 261. <sup>3</sup>*P*-values represent results comparing characteristics between participants included in the secondary analysis group and those excluded from the secondary analysis group using *t*-tests, chi-square, and Wilcoxon rank sum tests, where appropriate. *p*-values reflect comparisons between groups with non-missing data. <sup>4</sup>NBC participants with missing exposure measures: DDE *n* = 37; HCB *n* = 37; ΣPCB<sub>4</sub> *n* = 37; Pb *n* = 40; Mn *n* = 80; MeHg *n* = 277; As *n* = 372. <sup>5</sup>NBC participants with missing covariate measures: age at exam *n* = 260; HOME score *n* = 297; maternal IQ *n* = 153; seafood during pregnancy *n* = 155. \**p* < 0.05. Abbreviations: DDE: dichlorodiphenyldichloroethylene; HCB: hexachlorobenzene; ΣPCB<sub>4</sub>: Sum of 4 PCB congeners (118, 138, 153, 180); Pb: lead; Mn: manganese; MeHg: methylmercury; As: arsenic.



**Table S9.** Complete-case results of multivariable linear regression analyses (difference in scaled scores associated with a twofold increase in exposure and 95% CI)<sup>1</sup> assessing the relation of prenatal exposure to a seven-chemical mixture with Delis-Kaplan Executive Function System (D-KEFS) cognitive flexibility scaled scores among New Bedford Cohort adolescents in the secondary analysis group<sup>2</sup>.

| Exposure                           | Trail-Making completion time<br>Difference<br>(95% CI) | Verbal Fluency switching accuracy<br>Difference<br>(95% CI) | Design Fluency total correct<br>Difference<br>(95% CI) | Color-Word completion time<br>Difference<br>(95% CI) |
|------------------------------------|--------------------------------------------------------|-------------------------------------------------------------|--------------------------------------------------------|------------------------------------------------------|
| Log <sub>2</sub> DDE               | -0.03 (-0.44, 0.37)                                    | 0.05 (-0.37, 0.48)                                          | -0.12 (-0.55, 0.32)                                    | 0.07 (-0.34, 0.49)                                   |
| Log <sub>2</sub> DDE <sup>2</sup>  | -                                                      | -                                                           | -                                                      | 0.16 (0.04, 0.27) *                                  |
| Log <sub>2</sub> HCB               | 0.14 (-0.24, 0.53)                                     | 0.00 (-0.41, 0.41)                                          | 0.23 (-0.19, 0.65)                                     | 0.11 (-0.27, 0.50)                                   |
| Log <sub>2</sub> ΣPCB <sub>4</sub> | -0.06 (-0.51, 0.40)                                    | -0.32 (-0.80, 0.16)                                         | -0.05 (-0.54, 0.44)                                    | -0.57 (-1.02, -0.12) *                               |
| Log <sub>2</sub> Pb                | 0.02 (-0.37, 0.40)                                     | 0.26 (-0.14, 0.66)                                          | -0.07 (-0.48, 0.34)                                    | -0.01 (-0.39, 0.37)                                  |
| Log <sub>2</sub> Mn                | -0.53 (-1.24, 0.17)                                    | -0.47 (-1.21, 0.28)                                         | 0.01 (-0.76, 0.78)                                     | -0.39 (-1.09, 0.31)                                  |
| Log <sub>2</sub> Mn <sup>2</sup>   | -                                                      | -                                                           | -1.58 (-2.63, -0.54) *                                 | -                                                    |
| Log <sub>2</sub> MeHg              | -0.09 (-0.45, 0.26)                                    | 0.22 (-0.16, 0.59)                                          | -0.04 (-0.43, 0.34)                                    | 0.18 (-0.17, 0.53)                                   |
| Log <sub>2</sub> As                | 0.10 (-0.24, 0.45)                                     | 0.17 (-0.19, 0.53)                                          | 0.05 (-0.32, 0.42)                                     | 0.02 (-0.32, 0.36)                                   |

<sup>1</sup>Exposures have been log<sub>2</sub>-transformed and models have been adjusted for child race, sex, age at exam, year of birth, and HOME score; maternal marital status at child's birth, IQ, seafood consumption during pregnancy, and smoking during pregnancy; maternal and paternal education and annual household income at child's birth; and study examiner. <sup>2</sup>Secondary analysis group: complete outcome, covariate and prenatal exposure biomarker data for DDE, HCB, ΣPCB<sub>4</sub>, Pb, Mn, MeHg, and As, *n* = 235. \**p* < 0.05. Abbreviations: DDE: dichlorodiphenyldichloroethylene; HCB: hexachlorobenzene; ΣPCB<sub>4</sub>: Sum of 4 PCB congeners (118, 138, 153, 180); Pb: lead; Mn: manganese; MeHg: methylmercury; As: arsenic.

**Table S10.** Inverse-probability weighted results of multivariable linear regression analyses (difference in scaled scores associated with a twofold increase in exposure and 95% CI)<sup>1</sup> assessing the relation of prenatal exposure to a seven-chemical mixture with Delis-Kaplan Executive Function System (D-KEFS) cognitive flexibility scaled scores among New Bedford Cohort adolescents in the secondary analysis group<sup>2</sup>.

| Exposure                           | Trail-Making completion time<br>Difference<br>(95% CI) | Verbal Fluency switching accuracy<br>Difference<br>(95% CI) | Design Fluency total correct<br>Difference<br>(95% CI) | Color-Word completion time<br>Difference<br>(95% CI) |
|------------------------------------|--------------------------------------------------------|-------------------------------------------------------------|--------------------------------------------------------|------------------------------------------------------|
| Log <sub>2</sub> DDE               | -0.12 (-0.53, 0.30)                                    | 0.06 (-0.36, 0.48)                                          | -0.18 (-0.61, 0.24)                                    | -0.06 (-0.50, 0.38)                                  |
| Log <sub>2</sub> DDE <sup>2</sup>  | -                                                      | -                                                           | -                                                      | 0.17 (0.06, 0.29) *                                  |
| Log <sub>2</sub> HCB               | 0.10 (-0.29, 0.50)                                     | -0.11 (-0.51, 0.29)                                         | 0.18 (-0.23, 0.58)                                     | 0.10 (-0.30, 0.50)                                   |
| Log <sub>2</sub> ΣPCB <sub>4</sub> | 0.02 (-0.46, 0.50)                                     | -0.40 (-0.89, 0.08)                                         | 0.01 (-0.48, 0.50)                                     | -0.51 (-1.00, -0.03) *                               |
| Log <sub>2</sub> Pb                | -0.02 (-0.42, 0.39)                                    | 0.35 (-0.06, 0.77)                                          | -0.01 (-0.43, 0.40)                                    | 0.00 (-0.41, 0.41)                                   |
| Log <sub>2</sub> Mn                | -0.39 (-1.14, 0.35)                                    | -0.33 (-1.08, 0.42)                                         | -0.08 (-0.87, 0.70)                                    | -0.33 (-1.08, 0.43)                                  |
| Log <sub>2</sub> Mn <sup>2</sup>   | -                                                      | -                                                           | -1.50 (-2.55, -0.45) *                                 | -                                                    |
| Log <sub>2</sub> MeHg              | -0.04 (-0.42, 0.35)                                    | 0.27 (-0.12, 0.65)                                          | -0.12 (-0.51, 0.27)                                    | 0.20 (-0.19, 0.59)                                   |
| Log <sub>2</sub> As                | 0.08 (-0.29, 0.46)                                     | 0.17 (-0.21, 0.55)                                          | 0.13 (-0.25, 0.52)                                     | -0.03 (-0.41, 0.35)                                  |

<sup>1</sup>Exposures have been log<sub>2</sub>-transformed and models have been adjusted for child race, sex, age at exam, year of birth, and HOME score; maternal marital status at child's birth, IQ, seafood consumption during pregnancy, and smoking during pregnancy; maternal and paternal education and annual household income at child's birth; and study examiner. <sup>2</sup>Secondary analysis group: complete outcome, covariate and prenatal exposure biomarker data for DDE, HCB, ΣPCB<sub>4</sub>, Pb, Mn, MeHg, and As, *n* = 235. \**p* < 0.05. Abbreviations: DDE: dichlorodiphenyldichloroethylene; HCB: hexachlorobenzene; ΣPCB<sub>4</sub>: Sum of 4 PCB congeners (118, 138, 153, 180); Pb: lead; Mn: manganese; MeHg: methylmercury; As: arsenic.
